# Supplementary material
Source: Springer Nature journal article supplement (https://www.springermedizin.de/resource/supplementary/13685_2014_31_MOESM9_ESM.pdf/9681246)
Supplement: MOESM9 [file 9681246]

Muscle Mat1a

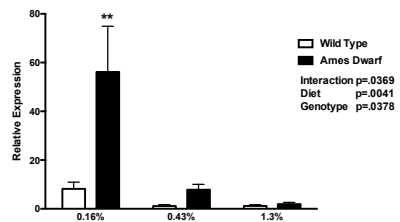

Muscle Mat2a

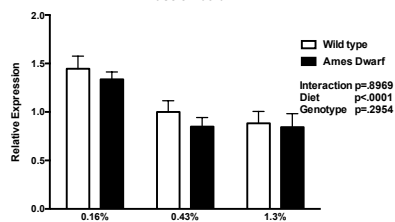

Muscle Gmmt

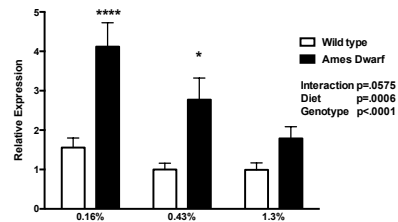

Muscle Ahcy

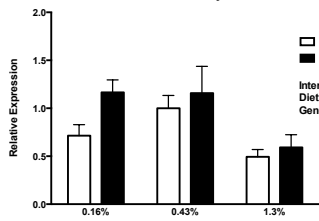

Muscle Mtr

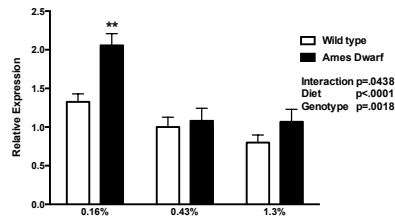

Muscle Mthfr

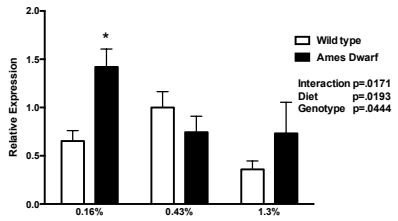

Muscle Bhmt

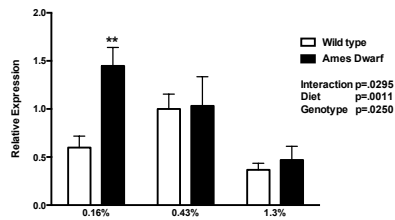

Muscle Cbs

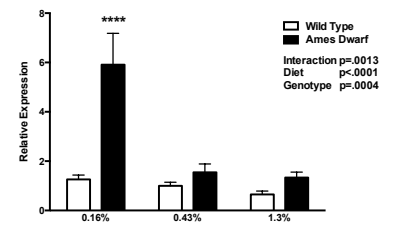

Muscle Cth

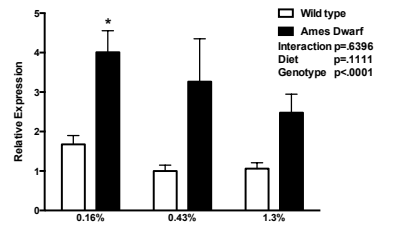

Muscle Gcic

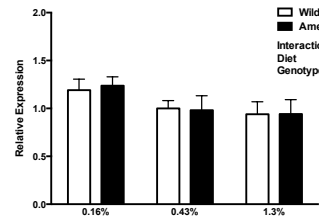

Muscle Gcim

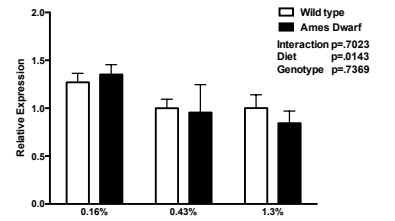

% methionine

% methionine
